# Supplementary material for: Rapid In-Field Volatile Sampling for Detection of Botrytis cinerea Infection in Wine Grapes
Source: MDPI journal article supplement (doi:10.3390/molecules28135227), 2023-07-05
Supplement: s1 [file s1]

# **Rapid In-Field Volatile Sampling for Detection of *Botrytis cinerea* Infection in Wine Grapes**

## **Supplementary Data**

Liang Jiang <sup>1-3</sup>, Morphy C. Dumlao <sup>1,2,4</sup>, William A. Donald <sup>4</sup>, Christopher C. Steel <sup>1,3</sup>, and Leigh M. Schmidtke <sup>1-3,\*</sup>

**1** Gulbali Institute, Charles Sturt University, Wagga Wagga, NSW, Australia 2678

**2** The Australian Research Council Training Centre for Innovative Wine Production, University of Adelaide (Waite Campus), SA, Australia 5064

**3** School of Agricultural, Environmental and Veterinary Science, Faculty of Science, Charles Sturt University, Wagga Wagga, NSW, Australia 2678

**4** School of Chemistry, Faculty of Science, University of New South Wales, NSW, Australia 2052

\* Correspondence: lschmidtke@csu.edu.au; Tel.: +61 2 6933 2016

**Table S1.** *p*-values for cross correlation between LFD signal intensity representing *B. cinerea* infection severities and volatile metabolites detection in grapes by thermal desorption GC-MS with ZIF-8 as absorbent materials using an enclosed glass container system for sampling. LFD: lateral flow device; 1,5-DMT: 1,5-dimethyltetralin; PEA: phenylethyl alcohol; 1,5-DMN: 1,5-dimethylnaphthalene.

[illegible]

**Table S2.** *p*-values for healthy (LFD = 12-14) and *B. cinerea* infected (LFD = 37-97) grape bunches. LFD: lateral flow device; 1,5-DMT: 1,5-dimethyltetralin; PEA: phenylethyl alcohol; 1,5-DMN: 1,5-dimethylnaphthalene.

|                                    | <i>hexanal</i> | <i>3-methyl-1-butanol</i> | <i>3-octanone</i> | <i>1-hexanol</i> | <i>3-octanol</i> | <i>2-hexen-1-ol</i> | <i>1-octen-3-ol</i> | <i>benzaldehyde</i> | <i>1,5-DMT</i> | <i>benzyl alcohol</i> | <i>PEA</i> | <i>1,5-DMN</i> |
|------------------------------------|----------------|---------------------------|-------------------|------------------|------------------|---------------------|---------------------|---------------------|----------------|-----------------------|------------|----------------|
| Enclosure sampling in glass system | <0.001         | 0.008                     | <0.001            | 0.046            | <0.001           | 0.072               | 0.149               | 0.07                | <0.001         | 0.005                 | 0.041      | <0.001         |
| SPME GC-MS                         | 0.054          | <0.001                    | <0.001            | 0.235            | <0.001           | <0.001              | <0.001              | 0.499               | 0.001          | 0.428                 | 0.023      | <0.001         |
| In-field sampling                  | 0.08           | 0.374                     | 0.034             | 0.142            | 0.136            | 0.138               | 0.421               | 0.346               | 0.189          | 0.105                 | 0.28       | 0.462          |

**Table S3.** *p*-values for cross correlation between LFD signal intensity representing *B. cinerea* infection severities and volatile metabolites detection in grapes by SPME GC-MS. LFD: lateral flow device; 1,5-DMT: 1,5-dimethyltetralin; PEA: phenylethyl alcohol; 1,5-DMN: 1,5-dimethylnaphthalene.

[illegible]

**Table S4.** *p*-values for cross correlation between LFD signal intensity representing *B. cinerea* infection severities and volatile metabolites detection in grapes by thermal desorption GC-MS with ZIF-8 as absorbent materials using low flow rate in-field sampling. LFD: lateral flow device; 1,5-DMT: 1,5-dimethyltetralin; PEA: phenylethyl alcohol; 1,5-DMN: 1,5-dimethylnaphthalene.

[illegible]
